# Supplementary material for: Porphyrins and Metalloporphyrins Combined with N-Heterocyclic Carbene (NHC) Gold(I) Complexes for Photodynamic Therapy Application: What Is the Weight of the Heavy Atom Effect?
Source: MDPI journal article supplement (doi:10.3390/molecules27134046), 2022-06-23
Supplement: s1 [file s1]

## Supporting Information

### Porphyrins and Metalloporphyrins Combined with N-heterocyclic Carbenes (NHC) Gold(I) Complexes for Photodynamic Therapy Application. What is the Weight of the Heavy Atom Effect?

Stefano Scoditti<sup>1</sup>, Francesco Chiodo,<sup>1</sup> Gloria Mazzone,<sup>1,\*</sup> Sébastien Richeter<sup>2</sup> and Emilia Sicilia<sup>1,\*</sup>

<sup>1</sup> Department of Chemistry and Chemical Technologies, Università della Calabria, Arcavacata di Rende (CS), 87036, Italy; stefano.scoditti@unical.it, francescochiodo22@gmail.com

<sup>2</sup> ICGM, Univ Montpellier, CNRS, ENSCM, Montpellier 34293, France; sebastien.richeter@umontpellier.fr,

\* Correspondence: gloria.mazzone@unical.it, emilia.sicilia@unical.it

#### Table of Contents

**Figure S1:** Superimposition of the optimized (green) and crystallographic (silver) structures of **Fused-FbAu**. Two selected computed and crystallographic dihedral angles in degrees are also reported. S2

**Table S1:** TD-DFT benchmark for **Fused-Fb** and **Fused-FbAu** species optimized at B3LYP/6-31G\*\* level in CH<sub>2</sub>Cl<sub>2</sub> implicit solvent. S3

**Table S2:** M06 maximum wavelengths for the Q and Soret bands calculated for the **Meso-Fb**, **Meso-Zn** and **Meso-ZnAu** species compared with the experimental counterparts. S4

**Figure S2:** Graphical representation of the highest occupied (HOMO, HOMO-1) and the lowest unoccupied (LUMO, LUMO+1) MOs for **Fused-ZnAu**, **Fused-PdAu** and all the **Meso** compounds. S5

**Table S3:** Main absorption wavelengths ( $\lambda$ ), vertical triplet electronic energies  $\Delta E$ , oscillator strengths,  $f$ , and main configuration for the examined **Fused** compounds in water solvent computed at M06/6-31G\*\* level of theory. S6

**Table S4:** Main absorption wavelengths ( $\lambda$ ), vertical triplet electronic energies  $\Delta E$ , oscillator strengths,  $f$ , and main configuration for the examined **Meso** compounds in water solvent computed at M06/6-31G\*\* level of theory. S7

**Figure S3:** Computed singlet-triplet splitting energies,  $\Delta E$  (eV), between singlet ( $S_{1-2}$ ) and triplets ( $T_{1-4}$ ) potentially involved in the ISC for a) **Fused** and b) **Meso** compounds. S8

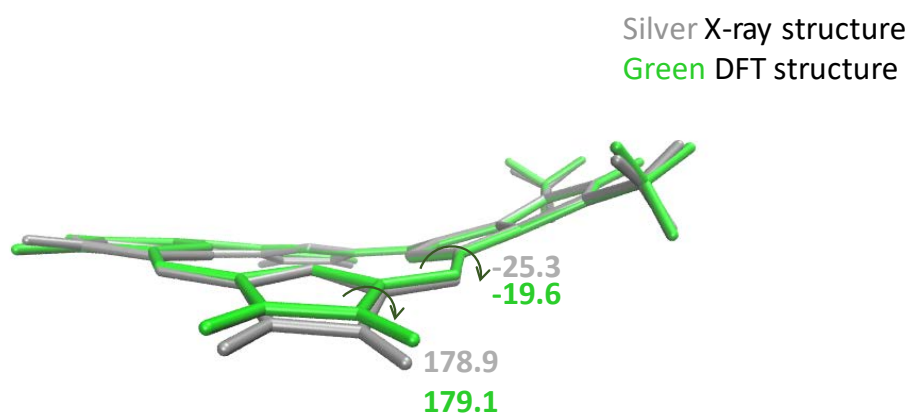

**Figure S1:** Superimposition of the optimized (green) and crystallographic (silver) structures of **Fused-FbAu**. Two selected computed and crystallographic dihedral angles in degrees are also reported.

**Table S1:** TD-DFT benchmark for **Fused-Fb** and **Fused-FbAu** species optimized at B3LYP/6-31G\*\* level in CH<sub>2</sub>Cl<sub>2</sub> implicit solvent.

| <b>Fused-Fb</b>                     | $\lambda_B(\text{nm})$ | $f$   | $\lambda_{Qy}(\text{nm})$ | $f$    | $\lambda_{Qx}(\text{nm})$ | $f$   |
|-------------------------------------|------------------------|-------|---------------------------|--------|---------------------------|-------|
| $\lambda_{\text{exp}}^a(\text{nm})$ | 428                    |       | 568                       |        | 657                       |       |
| B3LYP-D3                            | 414                    | 1.366 | 556                       | 0.061  | 594                       | 0.103 |
| PBE0-D3                             | 407                    | 1.720 | 546                       | 0.061  | 584                       | 0.100 |
| CAMB3LYP-D3                         | 391                    | 1.768 | 556                       | 0.032  | 610                       | 0.066 |
| M06                                 | 415                    | 2.052 | 570                       | 0.046  | 606                       | 0.091 |
| B3PW91                              | 413                    | 1.966 | 554                       | 0.066  | 591                       | 0.104 |
| LC-wPBE                             | 380                    | 1.893 | 605                       | 0.018  | 705                       | 0.035 |
| <b>Fused-FbAu</b>                   |                        |       |                           |        |                           |       |
| $\lambda_{\text{exp}}^b(\text{nm})$ | 429                    |       | 566                       |        | 661                       |       |
| B3LYP-D3                            | 414                    | 2.170 | 556                       | 0.073  | 592                       | 0.073 |
| PBE0-D3                             | 407                    | 2.250 | 545                       | 0.073  | 582                       | 0.070 |
| CAMB3LYP-D3                         | 393                    | 1.650 | 556                       | 0.042  | 609                       | 0.042 |
| M06                                 | 416                    | 2.264 | 570                       | 0.056  | 603                       | 0.063 |
| B3PW91                              | 413                    | 2.160 | 554                       | 0.079  | 589                       | 0.074 |
| LC-wPBE                             | 380                    | 2.510 | 604                       | 0.0249 | 708                       | 0.020 |

<sup>a</sup> Lefebvre, J.F. *European Journal of Organic Chemistry* **2010**, 1912–1920; <sup>b</sup> Longevial, J.F. *Organometallics* **2016**, 35, 663–672

**Table S2:** M06 maximum wavelengths for the Q and Soret bands calculated for the **Meso-Fb**, **Meso-Zn** and **Meso-ZnAu** species in the same solvent experimentally used.

| Compound                                                                                                                                            | Theo | Exp. <sup>a</sup> |
|-----------------------------------------------------------------------------------------------------------------------------------------------------|------|-------------------|
| <b>Meso-Fb<sup>b</sup></b>                                                                                                                          | 585  | 615               |
|                                                                                                                                                     | 411  | 413               |
| <b>Meso-Zn<sup>c</sup></b>                                                                                                                          | 557  | 548               |
|                                                                                                                                                     | 406  | 420               |
| <b>Meso-ZnAu<sup>c</sup></b>                                                                                                                        | 558  | 548               |
|                                                                                                                                                     | 407  | 420               |
| a. taken from Rose, C. et al. <i>Comptes Rendus Chimie</i> <b>2021</b> , 24. Recorded and computed in b. DMSO or c. CH <sub>2</sub> Cl <sub>2</sub> |      |                   |

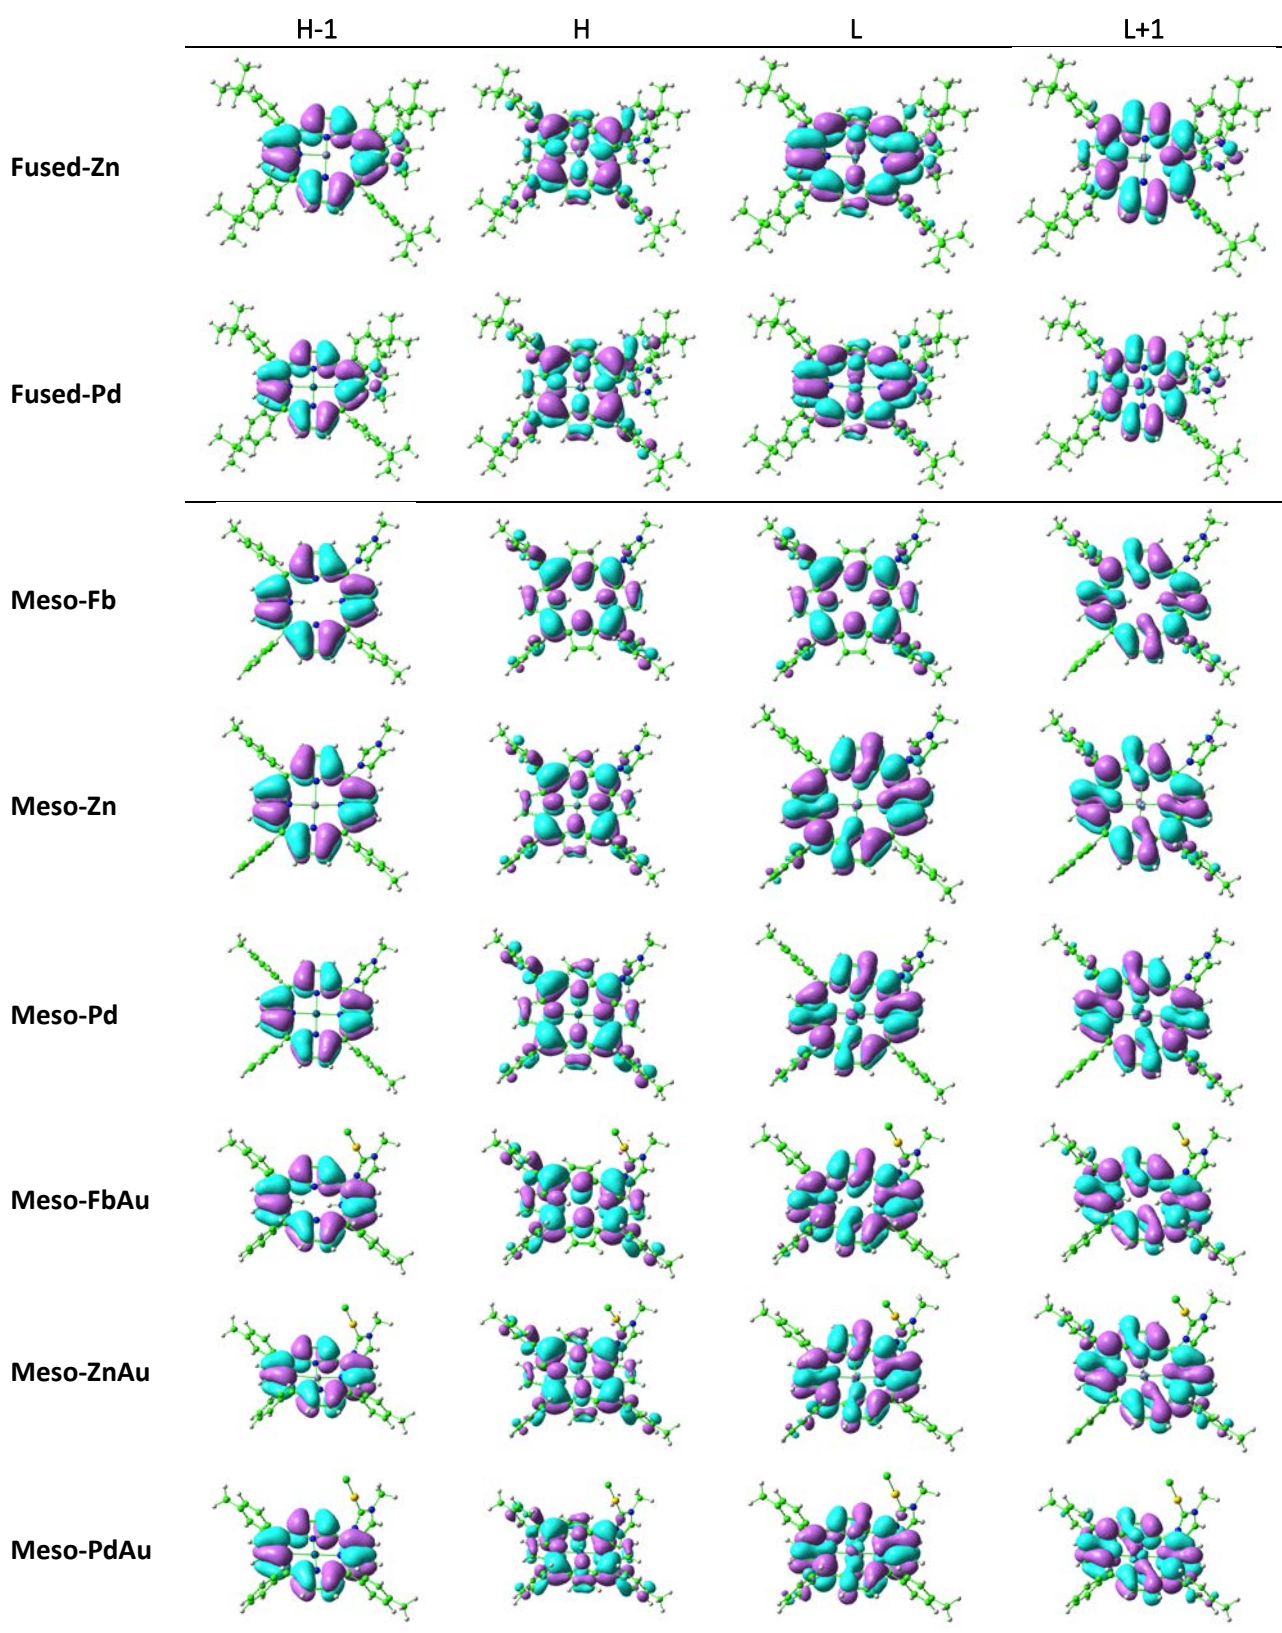

**Figure S2:** Graphical representation of the highest occupied (H, H-1) and the lowest unoccupied (L, L+1) MOs for **Fused-ZnAu**, **Fused-PdAu** and all the **Meso** compounds.

**Table S3:** Main absorption wavelengths ( $\lambda$ ), vertical triplet electronic energies  $\Delta E$ , oscillator strengths,  $f$ , and main configuration for the examined **Fused** compounds in water solvent computed at M06/6-31G\*\* level of theory.

| Compound          | Excited State  | $\Delta E$ (eV) | Transitions              |
|-------------------|----------------|-----------------|--------------------------|
| <b>Fused-Fb</b>   | T <sub>1</sub> | 1.21            | H→L+1 (80%), H-1→L (23%) |
|                   | T <sub>2</sub> | 1.50            | H→L (96%)                |
|                   | T <sub>3</sub> | 1.88            | H-1→L (78%), H→L+1 (22%) |
|                   | T <sub>4</sub> | 2.00            | H-1→L+1 (96%)            |
| <b>Fused-Zn</b>   | T <sub>1</sub> | 1.47            | H→L (83%)                |
|                   | T <sub>2</sub> | 1.49            | H→L+1 (82%)              |
|                   | T <sub>3</sub> | 1.94            | H-1→LUMO (82%)           |
|                   | T <sub>4</sub> | 1.95            | H-1→L+1 (83%)            |
| <b>Fused-Pd</b>   | T <sub>1</sub> | 1.60            | H→L (78%), H-1→L+1 (20%) |
|                   | T <sub>2</sub> | 1.63            | H→L+1 (80%)              |
|                   | T <sub>3</sub> | 2.04            | H-1→L+1 (79%), H→L (20%) |
|                   | T <sub>4</sub> | 2.04            | H-1→L (82%)              |
| <b>Fused-FbAu</b> | T <sub>1</sub> | 1.18            | H→L+1 (80%), H-1→L (24%) |
|                   | T <sub>2</sub> | 1.54            | H→L (96%)                |
|                   | T <sub>3</sub> | 1.88            | H-1→L (77%), H→L+1 (23%) |
|                   | T <sub>4</sub> | 1.99            | H-1→L+1 (96%)            |
| <b>Fused-ZnAu</b> | T <sub>1</sub> | 1.48            | H→L (82%)                |
|                   | T <sub>2</sub> | 1.49            | H→L+1 (81%)              |
|                   | T <sub>3</sub> | 1.93            | H-1→L (81%)              |
|                   | T <sub>4</sub> | 1.94            | H-1→L+1 (82%)            |
| <b>Fused-PdAu</b> | T <sub>1</sub> | 1.62            | H→L (80%)                |
|                   | T <sub>2</sub> | 1.63            | H-1→L (22%), H→L+1 (76%) |
|                   | T <sub>3</sub> | 2.02            | H-1→L (77%), H→L+1 (23%) |
|                   | T <sub>4</sub> | 2.04            | H-1→L+1 (81%)            |

**Table S4:** Main absorption wavelengths ( $\lambda$ ), vertical triplet electronic energies  $\Delta E$ , oscillator strengths,  $f$ , and main configuration for the examined **Meso** compounds in water solvent computed at M06/6-31G\*\* level of theory.

| Compound         | Excited State  | $\Delta E$ (eV) | Transitions                         |
|------------------|----------------|-----------------|-------------------------------------|
| <b>Meso-Fb</b>   | T <sub>1</sub> | 1.26            | H→L (41%), H→L+1 (32%), H-1→L (21%) |
|                  | T <sub>2</sub> | 1.63            | H→L (52%), H→L+1 (33%)              |
|                  | T <sub>3</sub> | 1.89            | H-1→L (64%), H→L+1 (35%)            |
|                  | T <sub>4</sub> | 1.98            | H-1→L+1 (90%)                       |
| <b>Meso-Zn</b>   | T <sub>1</sub> | 1.52            | H→L (86%)                           |
|                  | T <sub>2</sub> | 1.55            | H→L+1 (54%), H-1→L (45%)            |
|                  | T <sub>3</sub> | 1.93            | H-1→L (55%), H→L+1 (44%)            |
|                  | T <sub>4</sub> | 1.99            | H-1→L+1 (86%)                       |
| <b>Meso-Pd</b>   | T <sub>1</sub> | 1.64            | H→L (84%)                           |
|                  | T <sub>2</sub> | 1.67            | H→L+1 (50%), H-1→L (48%)            |
|                  | T <sub>3</sub> | 2.03            | H-1→L (51%), H→L+1 (47%)            |
|                  | T <sub>4</sub> | 2.08            | H-1→L+1 (85%)                       |
| <b>Meso-FbAu</b> | T <sub>1</sub> | 1.23            | H→L (41%), H→L+1 (35%)              |
|                  | T <sub>2</sub> | 1.63            | H→L (52%), H→L+1 (38%)              |
|                  | T <sub>3</sub> | 1.89            | H-1→L (69%), H→L+1 (27%)            |
|                  | T <sub>4</sub> | 1.99            | H-1→L+1 (88%)                       |
| <b>Meso-ZnAu</b> | T <sub>1</sub> | 1.50            | H→L (85%)                           |
|                  | T <sub>2</sub> | 1.54            | H→L+1 (64%), H-1→L (35%)            |
|                  | T <sub>3</sub> | 1.93            | H-1→L (65%), H→L+1 (35%)            |
|                  | T <sub>4</sub> | 1.99            | H-1→L+1 (86%)                       |
| <b>Meso-PdAu</b> | T <sub>1</sub> | 1.63            | H→L (83%)                           |
|                  | T <sub>2</sub> | 1.67            | H→L+1 (60%), H-1→L (38%),           |
|                  | T <sub>3</sub> | 2.03            | H-1→L (62%), H→L+1 (37%)            |
|                  | T <sub>4</sub> | 2.08            | H-1→L+1 (84%)                       |

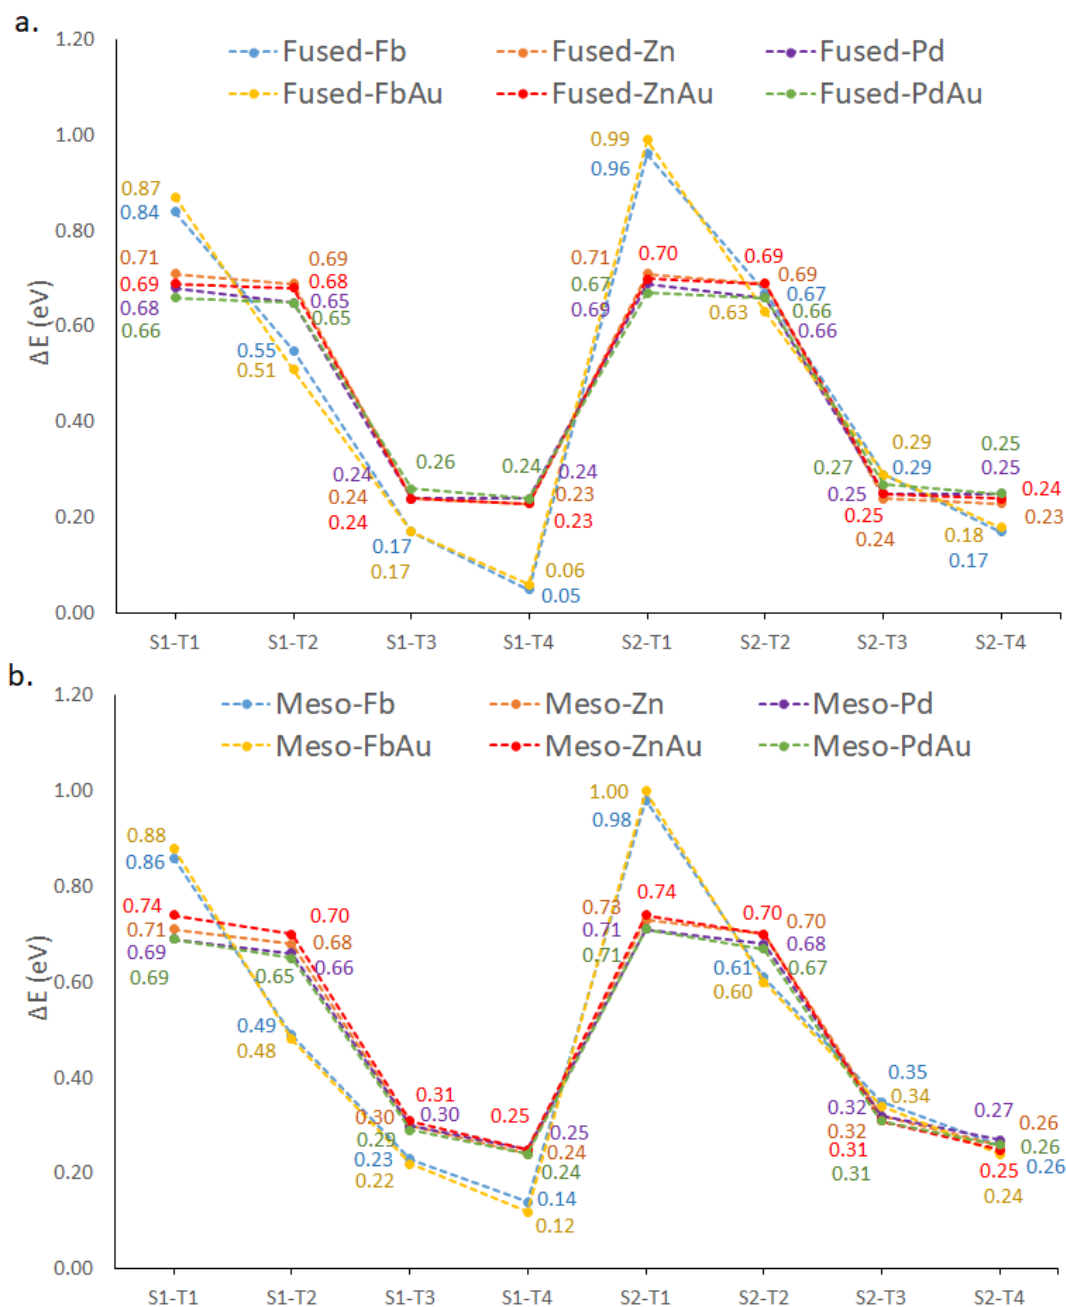

**Figure S3:** Computed singlet-triplet splitting energies,  $\Delta E$  (eV), between singlet ( $S_{1-2}$ ) and triplets ( $T_{1-4}$ ) potentially involved in the ISC for a) **Fused** and b) **Meso** compounds.
